# Supplementary material for: Variation of nitrogen species in zeolite-templated carbon by low-temperature carbonization of pyrrole and the effect on oxygen reduction activity
Source: Royal Society of Chemistry journal article supplement (doi:10.1039/c9ta01621j), 2019-01-01
Supplement: c9ta01621j1.pdf [file c9ta01621j1.pdf]

## Electronic Supplementary Information

### Variation of nitrogen species in zeolite-templated carbon by low-temperature carbonization of pyrrole and the effect on oxygen reduction activity

Seung Won Han,<sup>a,b</sup> Jisuk Bang,<sup>a,b</sup> Seung Hyeon Ko<sup>b</sup> and Ryong Ryoo<sup>a,b,\*</sup>

<sup>a</sup>Department of Chemistry, Korea Advanced Institute of Science and Technology (KAIST), Daejeon, 34141, South Korea

<sup>b</sup>Center for Nanomaterials and Chemical Reactions, Institute for Basic Science (IBS), Daejeon, 34141, South Korea

#### S1. Supporting experimental section

##### Determination of electron transfer number

The Koutecky–Levich (K–L) plots were derived at diverse potentials from the LSV curves obtained at various rotation speeds. The number of electrons transferred per oxygen molecule ( $n$ ) was determined from the slope ( $B$ ) of the K-L plot based on the K-L equation below:

$$\frac{1}{j} = \frac{1}{j_K} + \frac{1}{B\omega^{1/2}}$$

$$B = 0.2nF(D_0)^{2/3}C_0\nu^{-1/6}$$

where  $j$  is the measured current density,  $j_K$  is the kinetic-limiting current density,  $\omega$  is the electrode rotation rate,  $F$  is the Faraday constant (96 485 C mol<sup>-1</sup>),  $D_0$  is the diffusion coefficient of O<sub>2</sub> in 0.1 M KOH (1.9 × 10<sup>-5</sup> cm<sup>2</sup> s<sup>-1</sup>),  $C_0$  is the bulk concentration of O<sub>2</sub> (1.2 × 10<sup>-6</sup> mol cm<sup>-3</sup>), and  $\nu$  is the kinetic viscosity (0.01 cm<sup>2</sup> s<sup>-1</sup>).

##### RRDE measurements for determination of H<sub>2</sub>O<sub>2</sub> selectivity

The rotating ring disk electrode (RRDE) measurements were performed using a similar electrochemical set up for the rotating disk electrode (RDE) measurements (described in the Experimental Section). Instead of an RDE, an RRDE consisted of a glassy carbon (GC) disk (0.126 cm<sup>2</sup>) and a Pt ring (0.188 cm<sup>2</sup>) was used to simultaneously monitor currents for ORR and H<sub>2</sub>O<sub>2</sub> production. Prior to the measurement, both the GC disk and the Pt ring were electrochemically cleaned by cycling the potential between 1 and 0 V vs RHE 50 times at a scan rate of 500 mV s<sup>-1</sup> in N<sub>2</sub>-saturated 0.1 M KOH. The H<sub>2</sub>O<sub>2</sub> production activity was determined from the linear sweep voltammetry (LSV) curves obtained between 1 to 0 V vs RHE in O<sub>2</sub>-saturated 0.1 M KOH at a scan rate of 5 mV s<sup>-1</sup> and a rotation speed of 1600 rpm. The Pt ring potential was held constant at 1.45 V vs RHE. The H<sub>2</sub>O<sub>2</sub> current was calculated considering the correction of the ring current with the collection efficiency of the Pt ring (35%). The H<sub>2</sub>O<sub>2</sub> selectivity was determined based on the following equation:

$$H_2O_2 \text{ selectivity} = \frac{200i_r}{(Ni_d + i_r)}$$

Where  $i_r$  is the ring current,  $i_d$  is the disk current, and  $N$  is the collection efficiency of the ring.

## S2. Supporting figures and table

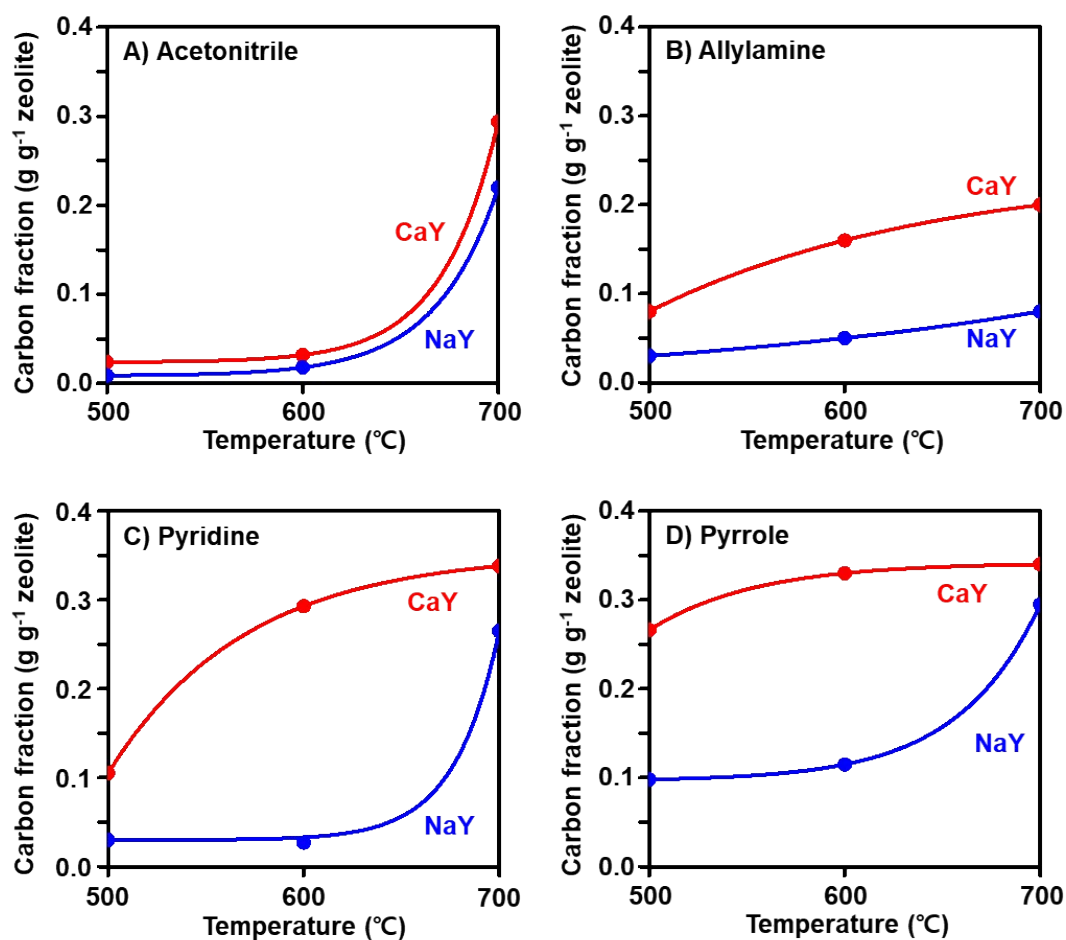

**Figure S1.** Amount of carbon deposited in Ca<sup>2+</sup>- and Na<sup>+</sup>-exchanged Y zeolite after 1 h of deposition plotted as a function of temperature. The precursors used for the carbonization were A) acetonitrile, B) allylamine, C) pyridine, and D) pyrrole.

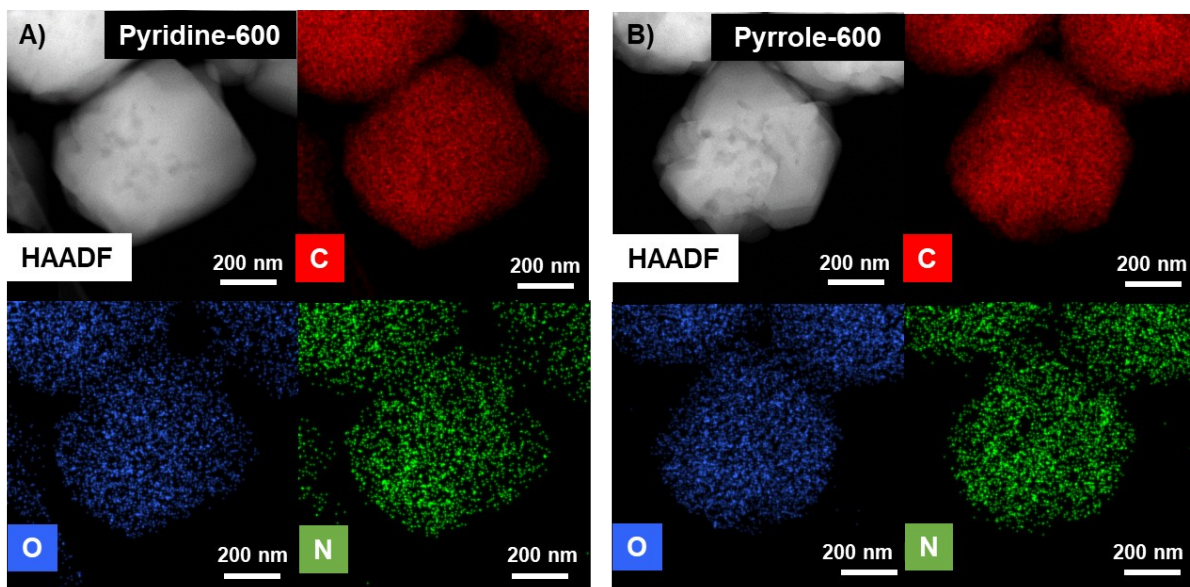

**Figure S2.** Energy dispersive X-ray spectroscopic mapping of N-ZTCs synthesized 600 °C using A) pyridine and B) pyrrole.

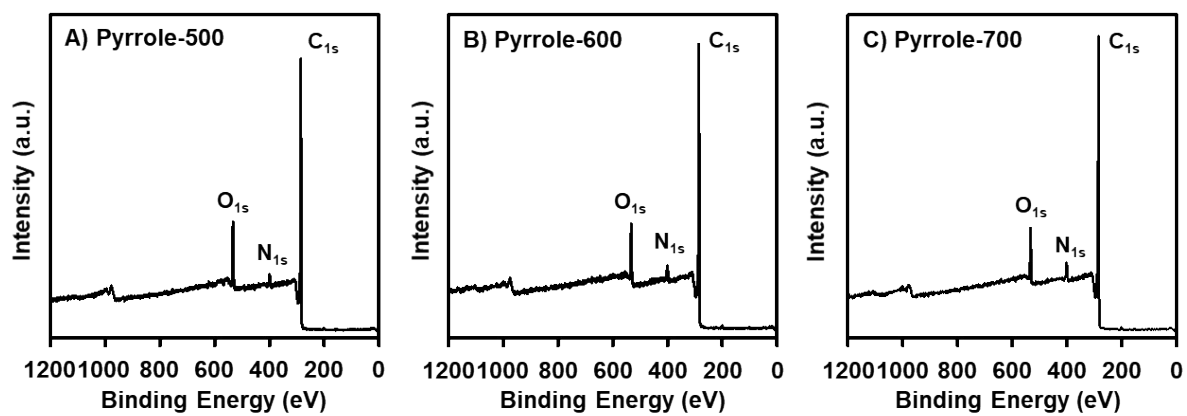

**Figure S3.** Survey XPS spectra of A) Pyrrole-500, B) Pyrrole-600, and C) Pyrrole-700.

**Table S1.** Nitrogen content and fraction of each N species of carbon deposits obtained before the framework-curing step

| Sample*      | N content (wt %) | Fraction (%) |            |             |          |
|--------------|------------------|--------------|------------|-------------|----------|
|              |                  | Pyridinic N  | Pyrrolic N | Graphitic N | N-oxides |
| Pyridine-600 | 7.8              | 56           | 21         | 12          | 11       |
| Pyrrole-500  | 7.6              | 25           | 47         | 14          | 14       |
| Pyrrole-600  | 6.3              | 33           | 31         | 21          | 15       |
| Pyrrole-700  | 6.1              | 33           | 26         | 25          | 16       |

\*Sample name = 'Precursor name-carbon deposition temperature in Celsius'.

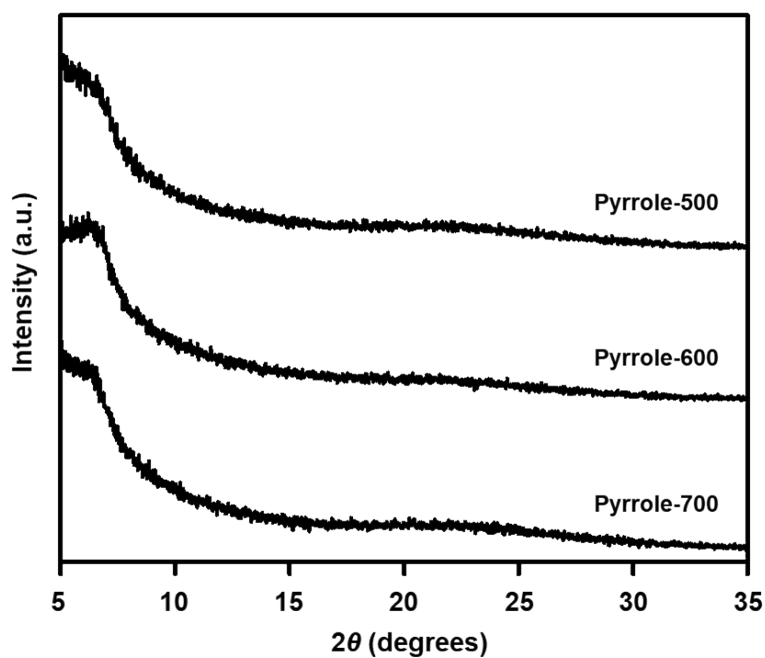

**Figure S4.** XRD patterns of Pyrrole-500, Pyrrole-600, and Pyrrole-700 samples.

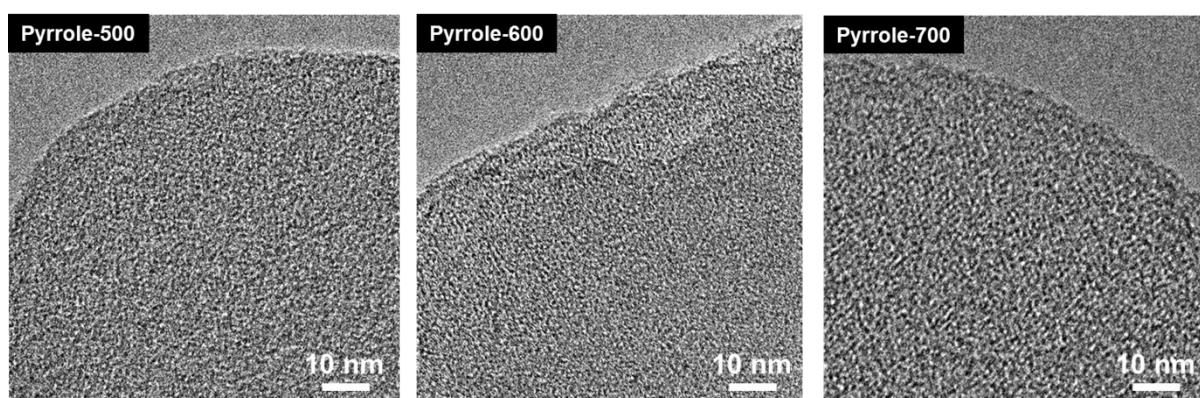

**Figure S5.** TEM images of Pyrrole-500, Pyrrole-600, and Pyrrole-700 samples.

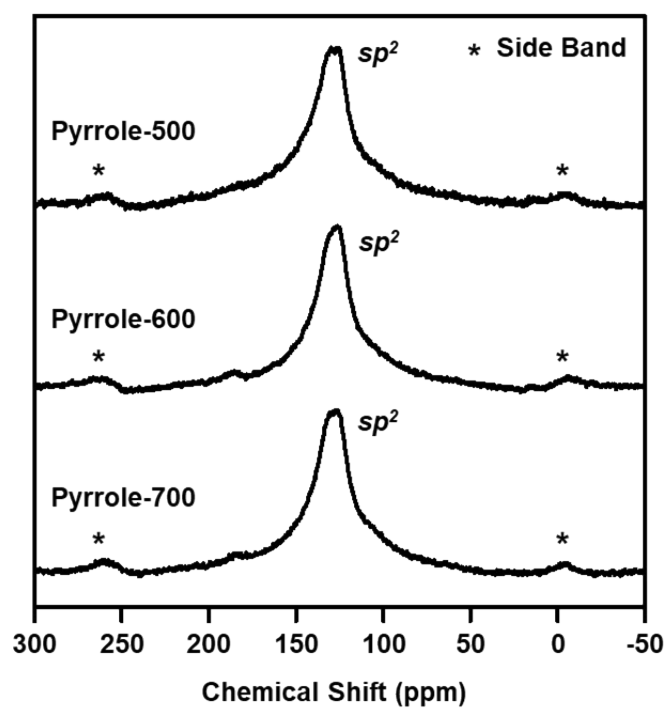

**Figure S6.** <sup>13</sup>C solid-state NMR spectra of Pyrrole-500, Pyrrole-600, and Pyrrole-700 samples. The predominant peak over 120-160 ppm signifies the presence of sp<sup>2</sup>-hybridized carbons. The small peak at 180 ppm represents the presence of oxygen-containing surface functional groups.

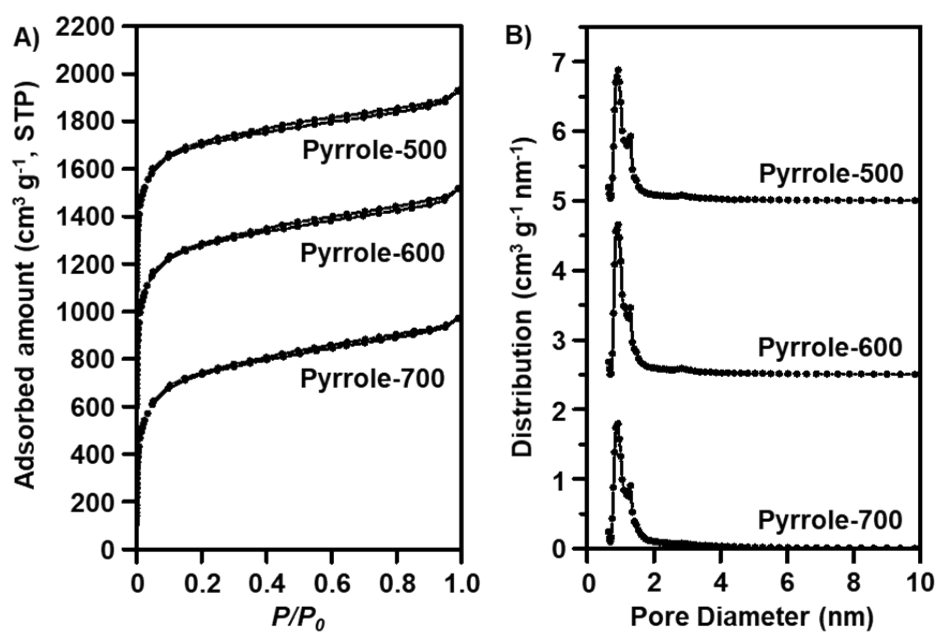

**Figure S7.** A) Argon adsorption-desorption isotherms and B) pore size distributions of Pyrrole-500, Pyrrole-600, and Pyrrole-700 (Offsets: A)  $500 \text{ cm}^3 \text{g}^{-1}$ , B)  $2.5 \text{ cm}^3 \text{g}^{-1} \text{nm}^{-1}$ ).

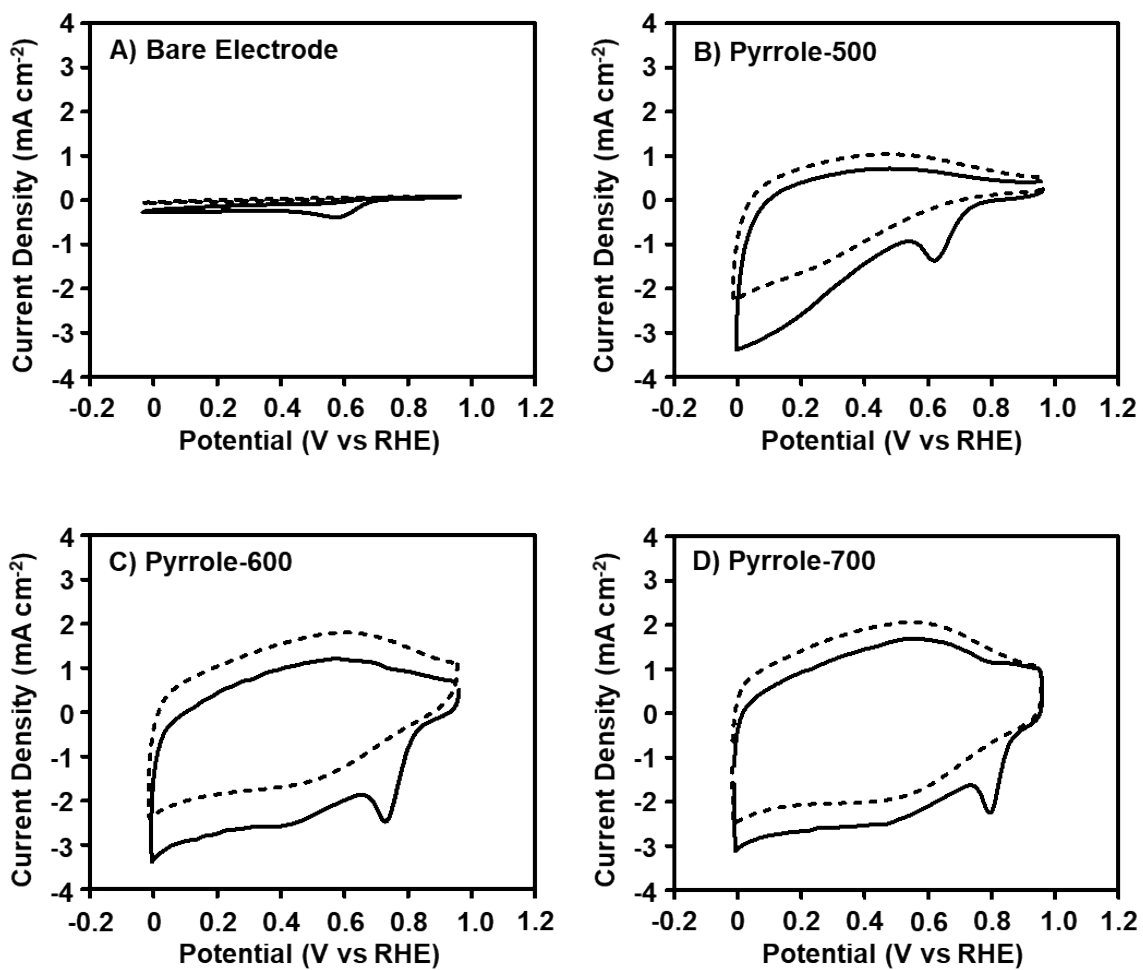

**Figure S8.** Cyclic voltammetry curves of A) bare electrode, B) Pyrrole-500, C) Pyrrole-600, and D) Pyrrole-700 obtained at a scan rate of  $20 \text{ mV s}^{-1}$  (dotted line: in  $\text{N}_2$ -saturated  $0.1 \text{ M KOH}$ , solid line: in  $\text{O}_2$ -saturated  $0.1 \text{ M KOH}$ ).

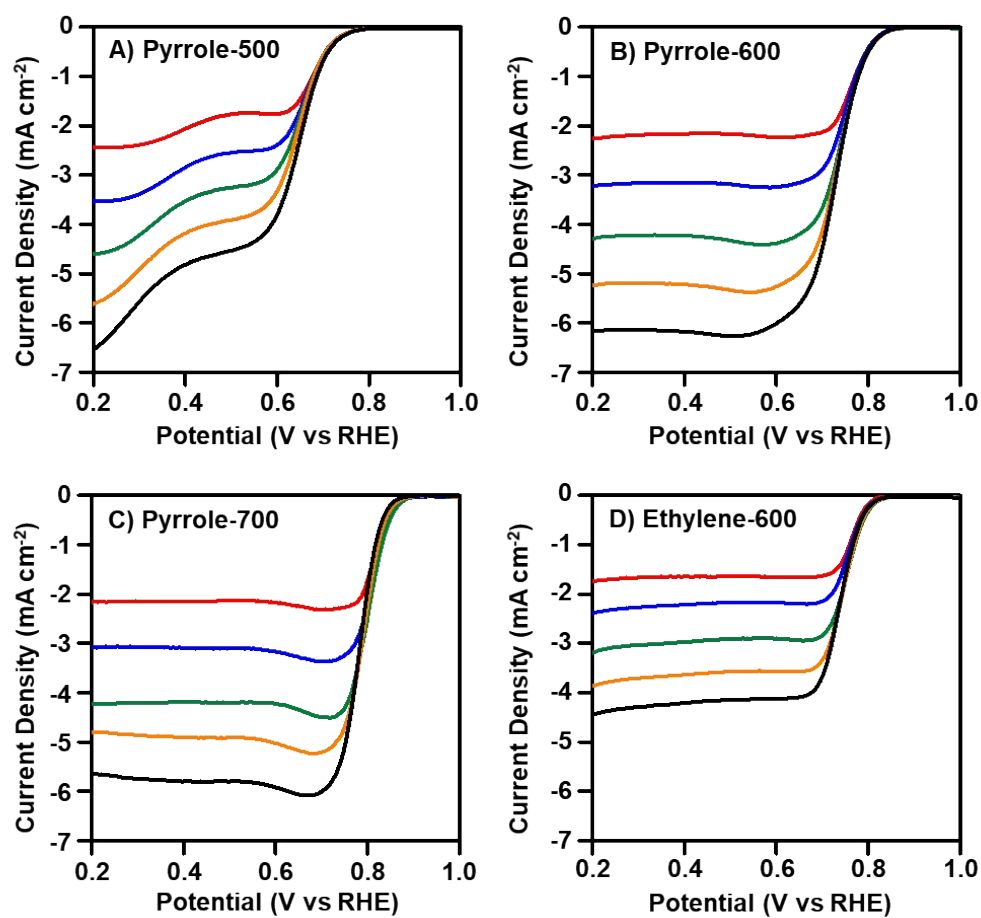

**Figure S9.** RDE curves of A) Pyrrole-500, B) Pyrrole-600, C) Pyrrole-700, and D) Ethylene-600 obtained at different rotating rates (from top to bottom: 400, 900, 1600, 2500, and 3600 rpm) and a scan rate of 5 mV s<sup>-1</sup> in an O<sub>2</sub>-saturated 0.1 M KOH.



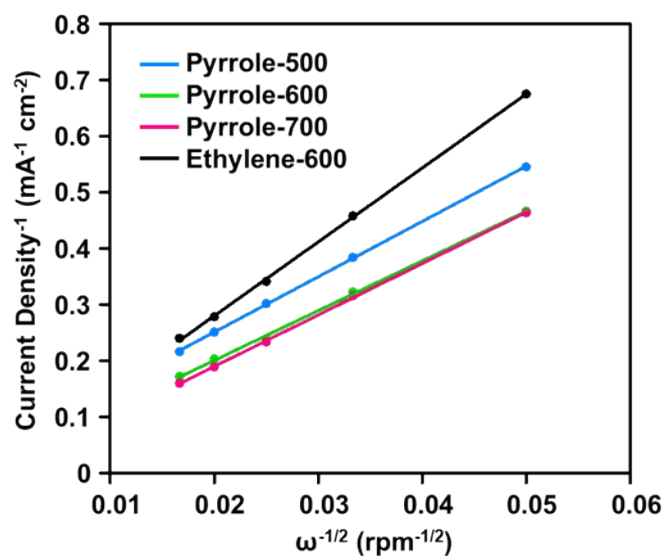

**Figure S10.** K-L plots determined from the RDE curves of Pyrrole-500, Pyrrole-600, Pyrrole-700 and Ethylene-600 at 0.5 V vs RHE.

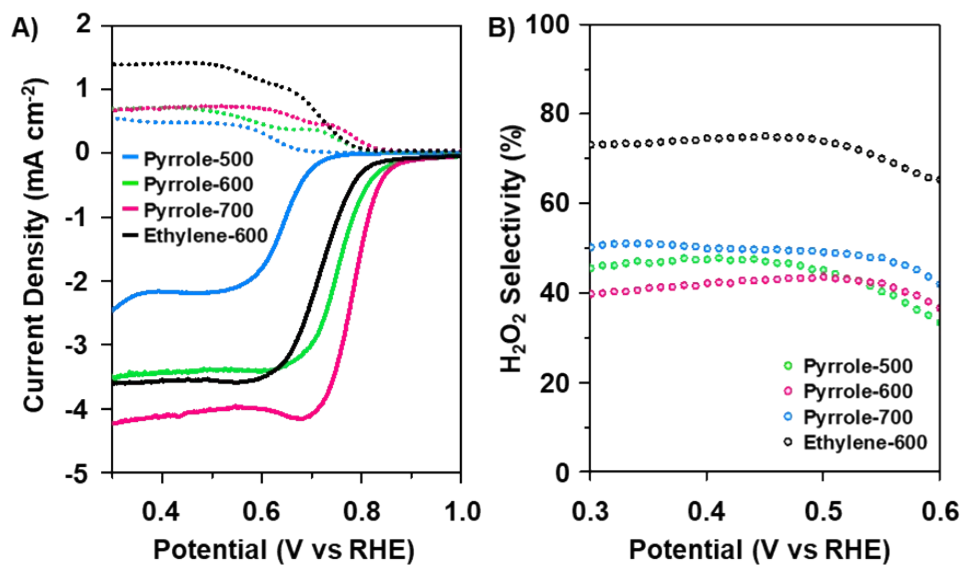

**Figure S11.** A) LSV curves of Pyrrole-500, Pyrrole-600, Pyrrole-700 and Ethylene-600 for ORR (solid lines) and H<sub>2</sub>O<sub>2</sub> production (dotted lines) obtained at 1600 rpm and a scan rate of 5 mV s<sup>-1</sup> in an O<sub>2</sub>-saturated 0.1 M KOH. The H<sub>2</sub>O<sub>2</sub> current was calculated by the correction of the ring current with the collection efficiency of the Pt ring. B) H<sub>2</sub>O<sub>2</sub> selectivity determined using the RRDE method.

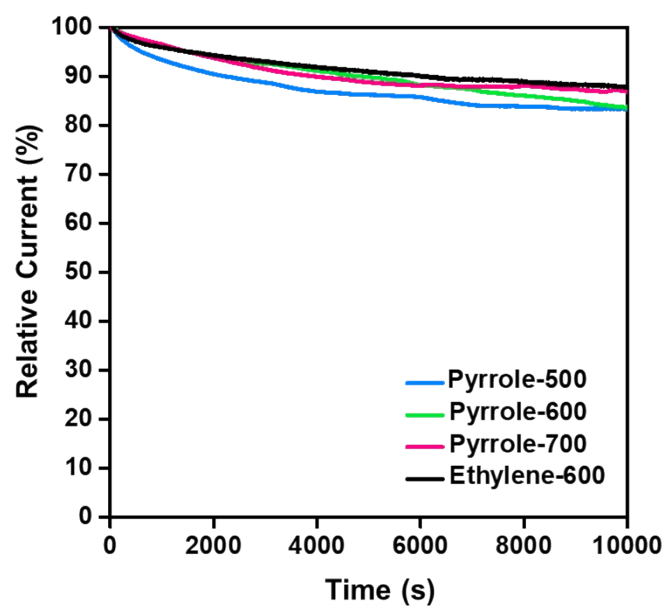

**Figure S12.** Chronoamperometric responses of Pyrrole-500, Pyrrole-600, Pyrrole-700 and Ethylene-600 measured at the half-wave potential in  $O_2$  saturated 0.1 M KOH for 10000 s.

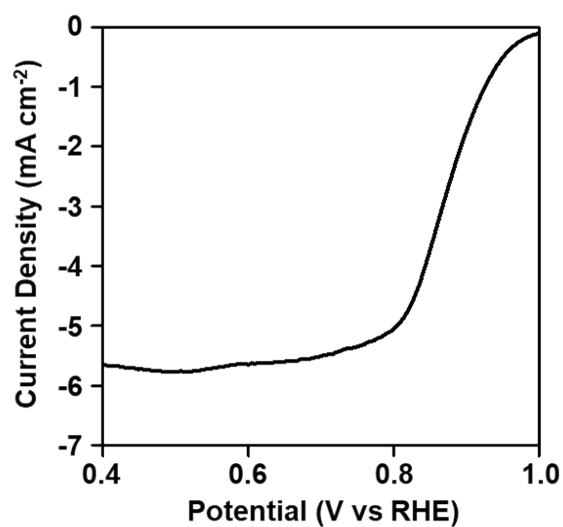

**Figure S13.** LSV curve of Pt/C benchmark catalyst (20 wt% Pt, purchased from Johnson Matthey) obtained at a scan rate of 5 mV/s.
